# Supplementary material for: The impact of repeated vaccination on influenza vaccine effectiveness: a systematic review and meta-analysis
Source: PubMed Central journal article supplement (PMC5563917; doi:10.1186/s12916-017-0919-0), 2017-08-21

**Supplementary Figure 1.** Results of the risk of bias assessment by category using the Newcastle-Ottawa Scale

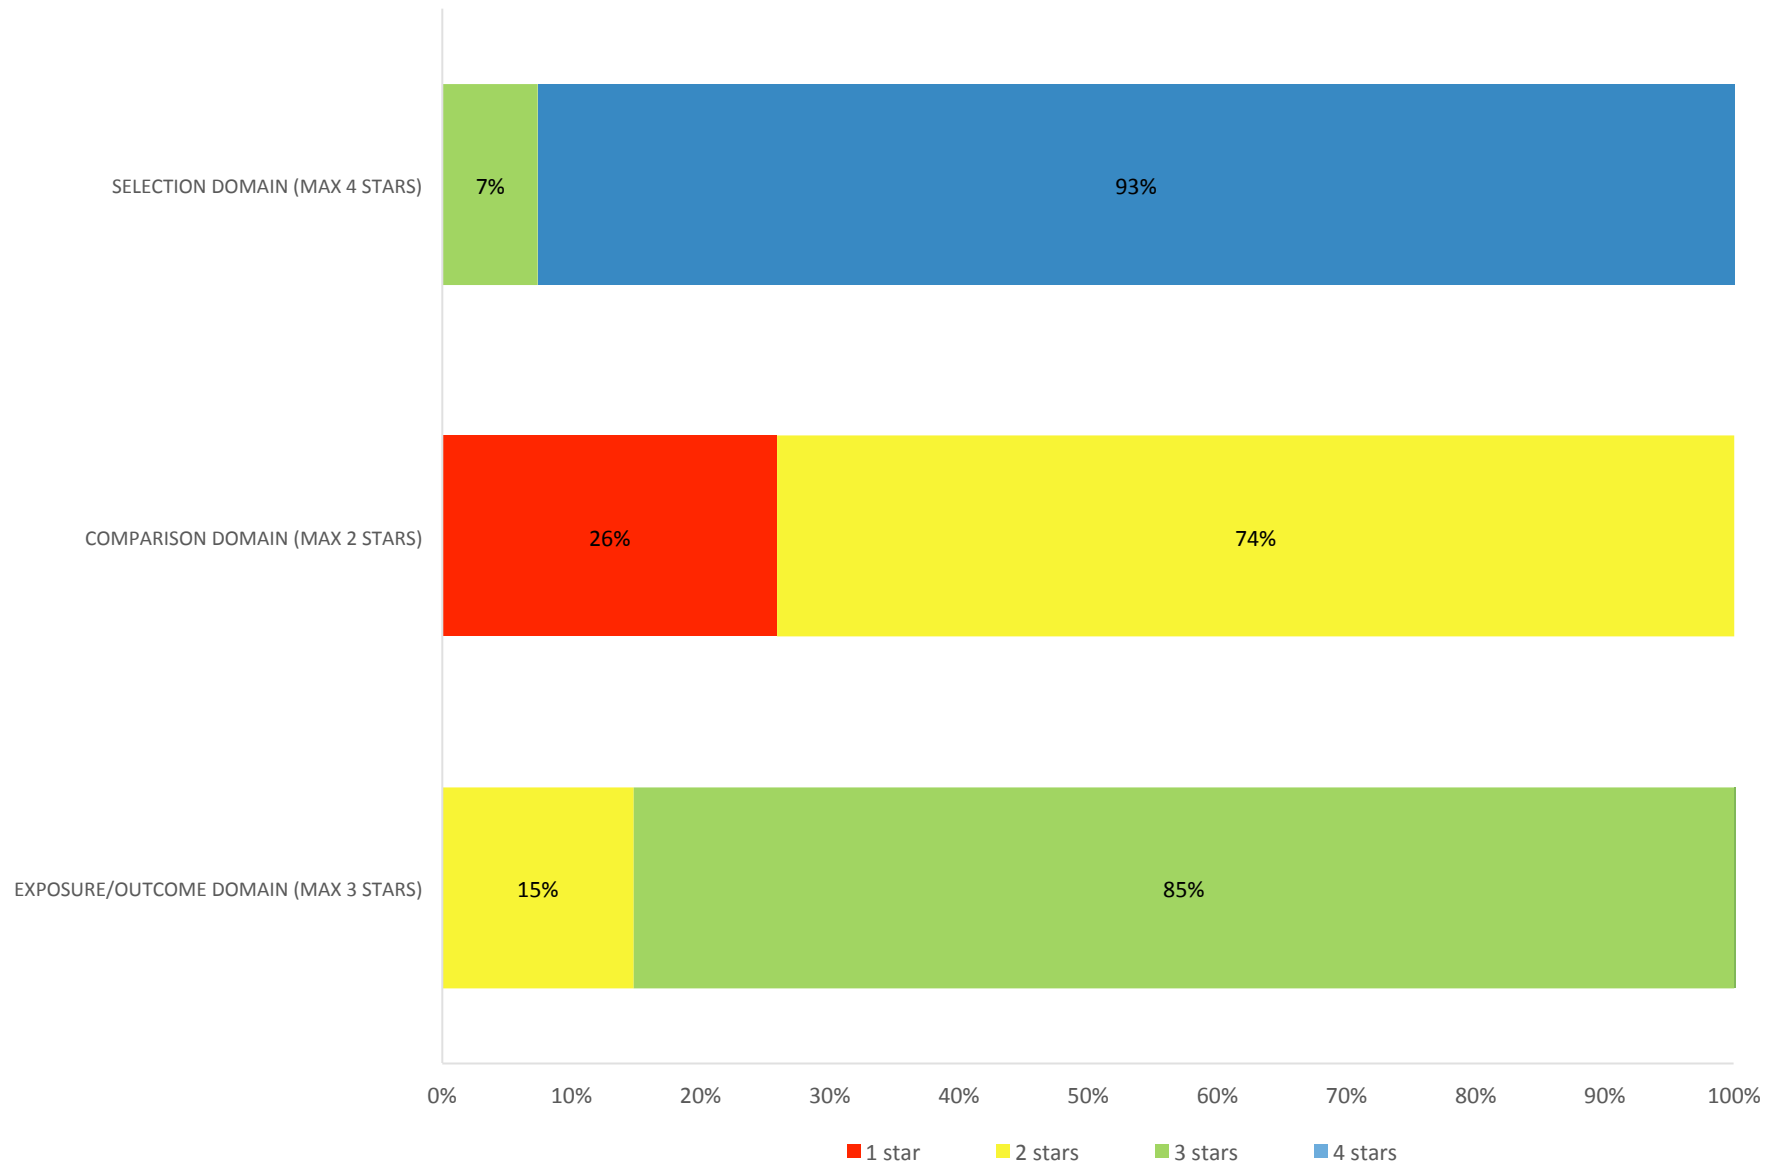

Supplement: 12916_2017_919_MOESM3_ESM.pdf [file 12916_2017_919_MOESM3_ESM.pdf]
